# Supplementary material for: Managing non-target wildlife mortality whilst using rodenticides to eradicate invasive rodents on islands
Source: Research Square preprint supplement (doi:10.21203/rs.3.rs-708711/v1), 2021-08-10
Supplement: Supplementary file 1 [file c902bfdc7bbeba14de805b6c.xlsx]

## Sheet: Online resource 2
Electronic Supplementary Material
Article title: Managing non-target wildlife mortality whilst using rodenticides to eradicate invasive rodents on islands
Journal: Biological invasions
Authors: Paula A. Castaño*, Karl J. Campbell, Greg S. Baxter, Victor Carrion, Francesca Cunninghame, Penny Fisher, Richard Griffiths, Chad C. Hanson, Gregg R. Howald, Wesley J. Jolley, Bradford S. Keitt, Pete J. McClelland, Julia B. Ponder, Danny Rueda, Glyn Young, Christian Sevilla, Nick D. Holmes
*Corresponding author affiliation: Island Conservation, Charles Darwin Ave., Puerto Ayora, Galápagos Islands, Ecuador, E-mail: paula.castano@islandconservation.org
Online Resource 2 Records of tactics undertaken to mitigate non-target wildlife mortality during rodent eradication projects on islands identified through this review
Project (Island Name)	Region_Archipelago	Number of islands (islets) treated in each Project	Mitigation strategies and tactics																				Total Classes of wildlife for which mitigation was implemented	Type of Wildlife Classes ^	References
			Exposure Avoidance					Risk minimization										Post-impact remediation
			Tactic 1. Utilising predictable, or inducing, absence or inactivity	Tactic 2. Captive holding in situ	Tactic 3. Captive holding ex situ	Tactic 4. Conservation translocation off-island	STRATEGY IMPLEMENTED Yes: 1; No: 0	Tactic 5. Rodenticide choice	Tactic 6. Reduce bait atractiveness	Tactic 7. Bait application method	Tactic 8. Optimizing bait application rates, bait availability	Tactic 9. Stagger bait deployment	Tactic 10. Strengthen resilience	Tactic 11. Provision of alternative food	Tactic 12. Reduce toxicant availability by 2ry exposure pathways	Tactic 13. Provision of treatment	STRATEGY IMPLEMENTED Yes: 1; No: 0	Tactic 14. Natural immigration	Tactic 15. Natural recovery	Tactic 16. Reintroduction	Tactic 17. Reinforcement	STRATEGY IMPLEMENTED Yes: 1; No: 0
Adele	Western Australia, Kimberly Coast	1	1				1		1	1	1				1		1	1	1			1	1	Avian	Palmer R (2013); Palmer R (2014)
Adele, Fisherman, Tonga	Tasman Bay, New Zealand	3					0		1								1					0	1	Avian	Golding C (2010)
Allen Cay	Bahamas (Exuma Islands)	1	1			1	1										0					0	2	Avian, Reptile	Alifano A, et al. (2012)
Anacapa (Three islets)	Channel Islands, United States	3	1	1	1	1	1		1	1	1	1					1			1		1	2	Avian, Mammal, (Marine environment)	Howald GR, et al. (2005); Howald GR, et al. (2010); Parkes JP, et al. (2009); Samaniego-Herrera A, et al. (2009); Jones HP, et al. (2011); Howald G, et al. (2015); Parkes J and Fisher P (2017)
Antipodes	Antipodes Islands, New Zealand	1					0										0	1				1	1	Avian	Elliott G, et al. (2015); Horn S, et al. (2019)
Barrow* and Middle	Western Australia	2					0			1							1	1	1	1		1	1	Mammal	Morris KD (2002); Burbidge AA and Morris KD (2002); Parkes J, et al. (2007), Parkes J, et al. (2009)
Bagaud	Hyeres Islands, France	1	1				1			1							1					0	1	Avian	Ruffino L, et al. (2015)
Bense and Little Bense combined	Falklands Islands (Bense Islands group)	2					0								1		1					0	1	Avian	Carey PW (2019)
Bird	Seychelles	1	1	1			1		1	1							1					0	3	Reptile, Avian, Invertebrate	Shah NJ (2001); Orueta JF and Aranda YR (2001); Merton D, et al. (2002); Courchamp F, et al. (2003)
Bischof	Haida Gwaii, Canada	1	1				1		1	1	1			1	1		1					0	1	Avian	P. McClelland unpublished data
Boodie	Western Australia	1					0			1							1					0	1	Mammal	Morris KD (2002); Courchamp F, et al. (2003);
Breaksea	Fiorland, New Zealand	1				1	1			1							1					0	1	Avian	Buckle AP and Fenn MGP (1992); Taylor RH and Thomas BW (1993); Towns DR and Broome KG (2003); Howald GR, et al. (2007); Coeurdassier M, et al. (2018)
Broughton Island Group	Myall Coast Islands, Australia	3	1				1				1						1					0	2	Avian, Amphibian	Priddel D, et al. (2011)
Brush Island	New South Wales, Australia	1					0								1		1					0	1	Avian	Priddel D, et al. (2011)
Buck Island	Lesser Antilles (US Virgin Islands)	1					0			1							1					0	2	Avian, Invertebrate	Witmer GW, et al. (2007), Clark DW, et al. (2008)
Campbell	New Zealand Islands	1	1				1										0					0	1	Avian	Broome K (2009); McClelland P (2011)
Canna	Inner Hebrides, Scotland Islands	1	1		1		1	1	1	1							1					0	2	Mammal, Avian	Patterson AJ (2006); Bell E, Boyle D, et al. (2011)
Cayo Norte mayor, Cayo Norte menor, Cayo centro combined	Banco Chinchorro, Mexico	3	1	1			1										0					0	2	Avian, Reptile	Samaniego-Herrera A, et al. (2018)
Cocos	Mariana Islands, Guam	1	1				1	1	1	1							1					0	1	Avian	Lujan DT, et al. (2010)
Codfish (Whenua Hou)	Stewart Islands, New Zealand	1		1		1	1			1	1						1					0	2	Mammal, Avian	McClelland P (2002); Broome K (2009)
Desecheo	Greater Antilles (Puerto Rican Islands)	1		1			1		1								1					0	2	Reptile, Avian, Marine environment	Will DJ, et al. (2019); JL. Herrera-Giraldo unpublished data.
Dog	Lesser Antilles (Anguilla Islands)	1					0			1							1					0	1	Reptile	Daltry JC and Bell EA (2018), Daltry, et al. (2019)
Double (Moturehu)	Mercury Islands, New Zealand	1					0										0	1				1	1	Avian	McFadden I (1992)
Double, Table, Tiam'bouène	New Caledonia	3	1				1			1							1					0	1	Avian	Baudat-Franceschi J, et al. (2011)
Enderby and Rose	Auckland Islands, New Zealand	2					0	1	1								1	1	1			1	1	Avian	Torr N (2002)
Farallon de San Ignacio and San Pedro Martir	Gulf of California, Mexico	2	1				1			1							1					0	2	Avian, Mammal, (Marine environment)	Samaniego-Herrera A, et al. (2009)
Fregate, Curiese, Denis	Seychelles	3		1	1		1		1	1							1			1		1	4	Avian, Reptile, Invertebrates, Freshwater Fish	Thorsen M, et al. (2000); Millet JE, et al. (2000); Parr SJ, et al. (2000); Shah NJ (2001); Merton D, et al. (2002); Courchamp F, et al. (2003)
Garbh Eilean and Eilean an Taighe	Scotland Islands (Shiant Isles)	2					0							1			1					0	1	Avian	Main CE, et al. (2019)
Grassy Key	Florida Keys, United States	1					0		1	1							1					0	1	Mammal	Witmer GW et al. (2010); Witmer GW and Hall P (2011)
Great Bird, West Maiden, Codrington, East Maiden, Lobster, Little Lobster, Rabbit, Redhead, Galley minor, Galley major	Lesser Antilles, Antigua	10	1				1								1		1					0	1	Reptiles	Daltry J (2000)
Hawadax (Rat)	Aleutian Islands, United States	1	1				1		1	1	1				1		1					0	2	Avian, Mammal (marine), Marine environment	Salmon T, et al. (2010); Buckelew S, et al. (2011); Howald G, et al. (2015)
Henderson	Pitcairn Islands	1		1			1									1	1					0	1	Avian	Brooke M de L, Cuthbert RJ, et al. (2011); Brooke M de L, Harrison G, et al. (2012); Cuthbert RJ, et al. (2012); Brown D (2013); Hall J, et al. (2014); Oppel S, Bond AL, et al. (2016); Oppel S, Lavers JL, et al. (2016); Brooke M de L (2019)
Île Plate, Île aux Rats, Île Bono, Les Mottes, Île aux Moines	Sept-îles, France	5	1				1				1						1					0	1	Avian	Pascal M, et al. (1996), Genovesi P (2001)
Île Hardy, Île Percé, Île Burgeaux, Île Poirier	Îlets de Sainte-Anne, Martinique	4					0				1						1					0		Unspecified	Genovesi P (2001), Pascal M, et al. (2004)
Isabel	Mexico	1	1				1										0					0		Unspecified	Samaniego-Herrera A, et al. (2020)
Kapiti	New Zealand Islands	1		1	1	1	1										0					0	1	Avian	Empson RA and Miskelly CM (1999); Courchamp F, et al. (2003); Towns DR and Broome KG (2003)
Rawaki, McKean and Birnie	Phoenyx Goup Islands, Kiribati	3	1				1										0					0	1	Avian	Thorsen M, et al. (2008); Pierce R, et al. (2008)
Langara	Haida Gwaii, Canada	1					0			1							1					0	2	Avian, Mammal	Drever MC (1997); Taylor RH, et al. (2000); Tompkins J (2000)
Lehua	Hawaiian Islands, United States	1	1				1	1									1					0	1	Avian	Parkes J and Fisher P (2017)
Little Barrier	Hauraki Gulf, New Zealand	1		1			1										0					0	2	Avian, Reptile	Fisher P, et al. (2011)
Lord Howe	Lord Howe Islands, Australia	1	1	1	1		1		1	1							1	1				1	3	Avian, Invertebrate, Reptile, (Marine environment)	Wilkinson I and Priddel D (2011); Lord Howe Island Board (2009); Lord Howe Island Board (2016); Lord Howe Island Board (2019); Walsh A, et al (2019); Wheeler R, et al. (2019); Harper GA, et al. (2020), P. McClelland unpublished data
Lucy	Haida Gwaii, Canada	1					0			1							1					0		Unspecified	Howald G (1997)
Lundy	Bristol Channel, United Kingdom	1					0			1							1					0	1	Avian	Bell EA (2019)
Macauley	Kermadec Islands, New Zealand	1					0						1				1					0	1	Avian	Greene T, et al. (2014)
Macquarie	Macquarie Islands, Australia	1	1				1			1	1				1		1					0	1	Avian	Springer K and Carmichael N (2012); Springer K (2012); Brown D (2013); Alderman R (2013); Less O (2014); Springer K (2016); Springer K (2018); Alderman R, et al. (2019)
Mokoia	Lake Rotorua, New Zealand	1			1		1										0					0	1	Avian	Mossman B (2001), Stephenson BM (1998)
Moku'auia (Goat Island)	Hawaiian Islands, United States	1					0			1							1					0	Unspecified	Unspecified (possibly avian)	Marie A, et al. (2014)
Molara	Sardinian Islands, Italy	1	1				1										0					0	1	Avian	Sposimo P, et al. (2011); Sposimo P, et al (2012)
Monito	Greater Antilles (Puerto Rican Islands)	1					0			1							1					0	1	Avian	García MA, et al. (2002)
Montebello Islands	Western Australia	37					0			1							1					0	1	Avian	Burbidge AA and Morris KD (2002), Burbidge AA (2004)
Montecristo	Tuscan Islands, Italy	1		1			1										0					0	1	Mammal (wild goat)	Sposimo P, et al. (2019)
Muertos, Pajaros and Perez combined	Gulf of Mexico (Arrecife Alacranes), Mexico	3	1				1										0					0	2	Avian, Reptile	Samaniego-Herrera A, et al. (2018)
Murchison and Faraday combined	Haida Gwaii, Canada	2	1				1		1	1					1		1					0	2	Avian, Mammal (Marine environment)	Gill C, et al. (2014)
Nishi	Ogasawara Islands (Chichijima Group), Japan	1					0	1		1							1					0	2	Avian, Invertebrate	Hashimoto T (2010)
Noises (Otata, Motuhorupapa)	New Zealand Islands	2					0			1							1					0	1	Avian	Buckle AP and Fenn MGP (1992)
North Seymour	Galapagos Islands, Ecuador	2			1	1	1		1							1	1	1				1	2	Avian, Reptile	P. Castaño unpublished data
Nu’utele and Nu’ulua	Samoa (Western (Aleipata Islands)	2		1			1										0			1		1	1	Avian	Butler DJ (2005); Butler DJ, et al. (2011); Bonham J and Griffiths R (2014)
Palmyra Atoll	Line Islands, United States Minor Outlying Islands	1	1	1			1									1	1					0	1	Avian	Howald G, et al. (2004); Wegmann A, et al. (2012); Brown D (2013); Howald G, et al. (2015)
Pinzon	Galapagos Islands, Ecuador	1	1	1	1		1		1	1						1	1	1	1		1	1	3	Avian, Reptile, Invertebrate	Fisher P and Campbell KJ (2012); Brown D (2013); Nicholls H (2013); Jensen EL, et al. (2015); Rueda D et al. (2016); Rueda D et al. (2019)
Plaza Sur	Galapagos Islands, Ecuador	1			1		1							1			1					0	1	Reptile	Fisher P and Campbell KJ (2012); Campbell KJ, et al. (2012)
Praslin	Lesser Antilles (St. Lucia Islands)	1	1				1		1						1		1					0	2	Avian, Reptile	Daltry J (2000)
Quail	Canterbury Islands, New Zealand	1					0			1	1						1					0		Unspecified	Kavermann M, et al. 2003
Rabida + 10 islets	Galapagos Islands, Ecuador	11			1		1		1	1							1					0	2	Avian, (Marine environment)	Campbell KJ (2010); Nicholls H (2013); Campbell KJ, et al. (2013); Schulwitz S, et al. (2018); Rueda D, et al. (2019)
Ramsey	Pembrokeshire, United Kingdom	1		1			1			1							1					0	2	Avian, Mammal	Bell EA, Bell MD, et al. (2019); Bell EA (2019)
Rangitoto and Motutapu combined	Hauraki Gulf, New Zealand	2	1				1								1		1					0	2	Avian, Reptile	Griffiths R and Towns D (2008)
Red Mercury (Whakau)	Mercury Islands, New Zealand	1					0									1	1					0	1	Avian	Robertson HA, et al (1993)
Redonda	Lesser Antilles (Antigua and Barbuda Islands)	1					0			1							1					0		Unspecified	Daltry JC and Bell EA (2018)
Reiono, Tetiaroa Atoll	Society Islands, French Polynesia	1					0			1							1					0		Avian	Samaniego A, et al. (2020)
Rey Franscisco & Congreso	Chafarinas Islands, Spain	2	1				1	1		1							1					0	1	Avian	Orueta JF and Ramos YA (1998); Orueta JF, et al. (2005)
Rimains, Chatellier, Rocher de Cancale	Cancale archipelago, France	3	1				1			1	1						1					0	2	Avian, Mammal	Pascal M, et al. (1996), Genovesi P (2001)
Rurima	Bay of Plenty, New Zealand	1					0		1								1					0	1	Avian	McFadden I and Towns D (1991)
Sangalaki	Derawan Islands, Indonesia	1					0		1	1							1					0		Unspecified (native species)	Meier GG and Varnham K (2004)
Stanley (Kawhitu)	Mercury Islands, New Zealand	1			1		1		1								1					0	2	Avian, Reptile	Towns D, et al. (1993)
Stephenson (Ririwha), Cone Island and stacks between	Whangaroa Bay, New Zealand	2					0			1							1					0	1	Unspecified, (Marine environment)	Jones C, et al. (2015)
St. Agnes and Gugh	Isles of Scilly, United Kingdom	2					0		1	1					1		1					0	1	Avian, Mammal	Bell E, Floyd K, et al. (2019); Pearson J, et al. (2019)
Selvagem Grande	Salvage Islands, Portugal	1		1		1	1			1						1	1					0	2	Avian, Reptile	Olivera P, et al. (2010); Howald G, et al. (2015)
South Georgia*	South Georgia Islands, South Georgia dna the South Sandwhich Islands	1	1				1					1					1					0	1	Avian	Martin A and Richardson M (2019)
Toreauta (Tahanea Atoll)	Tuamotu Archipelago, French Polynesia	1		1			1			1							1					0	1	Avian	Pott M, et al. (2014)
Tiritiri Matangi	Hauraki Gulf, New Zealand	1		1			1										0					0	1	Avian	Veitch CR (2002)
Trielen, Enez ar C'hrizienn	Molène Archipelago, France	2					0				1						1					0		Unspescified	Genovesi P (2001)
Vahanga	Tuamotu Archipelago, French Polynesia	1		1		1	1										0					0	1	Avian	Pierce R, et al. (2015); Griffiths R, et al. (2019)
Wake (Wake, Wilkes, Peale)	Wake Atoll, United States Minor Outlying Islands	3	1				1		1	1	1						1	1				1	1	Avian, (Marine environment)	C. Hanson (2019) unpublished data
Total		178	32	19	11	8	51	6	23	43	13	2	1	3	11	6	66	9	4	4	1	12
* Treatment area did not cover the entire island
^ Marine environment included for those projects where explicitily is indicated that non-target mitigation was undertaken to mitigate risk to marine environment
References:
Alderman R (2013) Managing the cost of pest eradication. Australian Antarctic Magazine 25:18-19
Alderman R, Tuck GN, Castillo-Jordán C, et al. (2019) Macquarie island's northern giant petrels and the impacts of pest eradication on population abundance. Ecological Modelling 393:66-75
Alifano A, Jolley W, Griffiths R (2012) Final Operational Report for the Removal of Introduced House Mice from Allen Cay, Exuma Islands, Bahamas. Island Conservation, Santa Cruz, CA.
Baudat-Franceschi J, Cromarty P, Golding C, et al. (2011) Rodent eradication to protect seabirds in New Caledonia: the importance of baseline biological surveys, feasibility studies and community support. In: Veitch CR, Clout M and Towns DR (eds) Island Invasives: Eradication and Management. IUCN, Gland, Switzerland, pp. 26-31
Bell EA (2019) It's not all up in the air: the development and use of ground-based rat eradication techniques in the UK. In: Veitch CR, Clout MN, Martin AR, Russell JC and West CJ (eds) Island Invasives: Scaling up to meet the challenge. IUCN, Gland, Switzerland, pp.79-87
Bell E, Boyle D, Floyd K, et al. (2011) The ground-based eradication of Norway rats (Rattus norvegicus) from the Isle of Canna, Inner Hebrides, Scotland. In: Veitch CR, Clout M and Towns DR (eds) Island Invasives: Eradication and Management. IUCN, Gland, Switzerland, pp. 269-274
Bell EA, Bell MD, Morgan G, et al. (2019) The recovery of seabird populations on Ramsey Island, Pembrokeshire, Wales, following the 1999/2000 rat eradication. In: Veitch CR, Clout MN, Martin AR, Russell JC and West CJ (eds) Island Invasives: Scaling up to meet the challenge. IUCN, Gland, Switzerland, pp. 539-544
Bell E, Daltry J, Mukhida F, et al. (2019) The eradication of black rats (Rattus rattus) from Dog Island, Anguilla using ground-based techniques. In: Veitch CR, Clout MN, Martin AR, Russell JC and West CJ (eds) Island Invasives: Scaling up to meet the challenge. IUCN, Gland, Switzerland, pp.162-166
Bell E, Floyd K, Boyle D, et al. (2019) The isles of Scilly seabird restoration project: the eradication of brown rats (Rattus norvegicus) from the inhabited islands of St. Agnes and Gugh, Isles of Scilly. In: Veitch CR, Clout MN, Martin AR, Russell JC and West CJ (eds) Island Invasives: Scaling up to meet the challenge. IUCN, Gland, Switzerland, pp. 88-94
Brooke M de L, Cuthbert RJ, Mateo R, et al. (2011) An experimental test of the toxicity of cereal pellets containing brodifacoum to the snails of Henderson Island, South Pacific. Wildlife Research 38(1):34-38
Brooke M de L, Harrison G, Cuthbert RJ (2012) The capture, husbandry and captive breeding of Henderson rails during the Henderson Island rat eradication and the impact of the project on native landbirds. RSPB, Sandy, Beds, U.K., pp. 38
Brooke M de L (2019) Rat eradication in the Pitcairn Islands south pacific: a 25-year perspective. In: Veitch CR, Clout MN, Martin AR, Russell JC and West CJ (eds) Island Invasives: Scaling up to meet the challenge. IUCN, Gland, Switzerland, pp. 95-99
Broome K (2009) Beyond Kapiti - a decade of invasive rodent eradications from New Zealand islands. Biodiversity 10:14-24
Brown D (2013) Feasibility study report for the potential eradication of ship rats, mice , rabbits and feral cats fro new Island, Falkland Islands. Unpublished report for New Island Conservation Trust.
Buckle AP, Fenn MGP (1992) Rodent control in the conservation of endangered species. In: Borreco JE, Marsh RE (eds) Proceedings 15th Vertebrate Pest Conference. University of California, Davis, USA, pp 36-41
Buckelew S, Byrd V, Howald G, et al. (2011) Preliminary ecosystem response following invasive Norway rat eradication on Rat Island, Aleutian Islands, Alaska. In: Veitch CR, Clout M and Towns DR (eds) Island Invasives: Eradication and Management. IUCN, Gland, Switzerland, pp. 275-279
Butler DJ (2005) Draft Project plan restoration of Nu'utele & Nu'ulua islands, Samoa 1.0 eradication of Pacific rat (Rattus exulans).
Butler DJ, Tye A, Wylie M, et al. (2011) Eradicating Pacific Rats (Rattus exulans) from Nu’utele and Nu’ulua Islands, Samoa – some of the challenges of operating in the tropical Pacific. In: Veitch CR, Clout M and Towns DR (eds) Island Invasives: Eradication and Management. IUCN, Gland, Switzerland, pp. 407-412
Burbidge AA, Morris KD (2002) Introduced mammal eradications for nature conservation on Western Australian islands: a review. In: Veitch CR and Clout MN (eds) Turning the tide: the eradication of invasive species. IUCN, Gland, Switzerland, pp. 64-70
Campbell KJ (2010) Non-target risk assessment for rodenticide applications in the Galapagos Islands, September 2010. Unpublished report. Island Conservation, Puerto Ayora, Galapagos, pp. 37
Campbell KJ, Aguilar K, Cayot L, et al. (2012) Galapagos land iguana (Conolophus subcristatus) mitigation during an aerial broadcast of brodifacoum cereal baits on Plaza Sur Island, Galapagos to eradicate house mice (Mus musculus) v4.0. Unpublished report, Island Conservation, Puerto Ayora, Galapagos, pp. 23
Campbell KJ, Carrión V, Sevilla C (2013) Increasing the scale of successful invasive rodent eradications in the Galápagos Islands. In: Cayot LJ, Cruz D and Knab R (eds) Galapagos Report 2011-2012. GNPS, CGREG, CDF and GC. Puerto Ayora, Galápagos, Ecuador, pp. 194-198
Carey PW (2019) Simultaneous rat, mouse, and rabbit eradication on Bense and Little Bense islands, Falkland Islands. In: Veitch CR, Clout MN, Martin AR, Russell JC and West CJ (eds) Island Invasives: Scaling up to meet the challenge. IUCN, Gland, Switzerland, pp. 108-113
Courchamp F, Chapuis J-L, Pascal M (2003) Mammal invaders on islands: impact, control and control impact. Biological Reviews 78(3):347-383
Coeurdassier M, Fritsch C, Jacquot M, et al. (2018) Spatial dimensions of the risks of rodenticide use to non-target small mammals and applications in spatially explicit risk modeling. In: van de Brink NW, Elliot JE, Shore RF, Rattner BA (eds) Anticoagulant rodenticides and wildlife, emerging topics in ecotoxicology 5. Springer International Publishing AG, Cham, Switzerland, pp 195-228
Cuthbert RJ, Brooke M de L, Torr N (2012) Overcoming hermit-crab interference during rodent-baiting operations: a case study from Henderson Island, South Pacific. Wildlife Research 39(1):70-77
Daltry JC (2000) The second rat eradication on Praslin Island, Saint Lucia, Ausgut-September 2000. Unpublished report. Fauna & Flora International, Cambridge, UK
Daltry JC, Bell EA (2018) Can brodifacoum save endangered species? Recent experiences from the West Indies. Outlooks on Pest Management 29:80-85. https://doi.org/10.1564/v29_apr_07
Drever MC (1997) Ecology and eradication of Norway rats on Langara Island, Queen Charlotte Islands. Master Thesis, Simon Fraser University, Burnaby, British Columbia, Canada
Elliot G, Green TC, Nathan HW, et al. (2015) Winter bait uptake trials and related field work on Antipodes Island in preparation for mouse (Mus musculus) eradication. DOC Research and Development Series 345. Department of Conservation, Wellington, New Zealand.
Empson RA, Miskelly CM (1999) The risks, costs, and benefits of using brodifacoum to eradicate rats from Kapiti Island, New Zealand. New Zealand Journal of Ecology 23(2):241-254
Fisher P, Griffiths R, Speedy C, et al. (2011) Environmental monitoring for brodifacoum residues after aerial application of baits for rodent eradication. In: Veitch CR, Clout M and Towns DR (eds) Island Invasives: Eradication and Management. IUCN, Gland, Switzerland, pp. 300-304
Fisher P, Campbell KJ (2012) Non-target risk assessment for rodenticide application on Pinzón and Plaza Sur, Galápagos Islands. Landcare Research, Lincoln, New Zealand, pp. 21
García MA, Diez CE, Alvarez AO (2002) The eradication of Rattus rattus from Monito Island, West Indies. In: Veitch CR and Clout MN (eds) Turning the Tide: The Eradication of Invasive Species. IUCN, Gland, Switzerland, pp. 116-119
Genovesi P (2001) Guidelines for eradication of terrestrial vertebrates: a European contribution to the invasive alien species issue. Council of Europe, Strasbourg, tpvs65e-2000
Gill C, Wein L, Howald G, et al. (2014) Challenges associated with eradicating invasive rodents from islands: Lessons learned. In: Timm RM and O’Brien JM (eds) Proceedings of the 26th Vertebrate Pest Conference. pp. 118-124
Greene T, Westbrooke IM, Brown D, et al. (2014) Assessing minimum population size of Kermadec parakeets (Cyanoramphus novaezelandiae cyanurus) on Macauley Island, Kermadec Islands. Notornis 61:154-161
Griffiths R, Towns D (2008) The Rangitoto and Motutapu pest eradication - a feasibility study. Department of Conservation, Auckland, New Zealand, pp. 95
Griffiths R, Cranwell S, Derand D, et al. (2019) Multi island, multi invasive species eradication in French Polynesia demonstrates economies of scale. In: Veitch CR, Clout MN, Martin AR, Russell JC and West CJ (eds) Island Invasives: Scaling up to meet the challenge. IUCN, Gland, Switzerland, pp. 611-617
Golding C (2010) House mouse (Mus musculus) eradication by aerial bait application on Adele, Tonga, and Fisherman Islands, Abel Tasman National Park, New Zealand. Conservation Evidence 7:62-88
Harper GA, Pahor S, Birch D (2020) The Lord Howe Island rodent eradication: lessons learnt from an inhabited island. In: Woods DM (ed) Proceedings 29th Vertebrate Pest Conference, Paper No. 31. University of California, Davis, USA, pp.
Hashimoto T (2010) Eradication and ecosystem impacts of rats in the Ogasawara Islands. In: Kawakami K and Okochi I (eds) Restoring the Oceanic Island Ecosystem. Springer, Tokyo, pp. 153-159
Horn S, Greene T, Elliott G (2019) Eradication of mice from Antipodes Island, New Zealand. In: Veitch CR, Clout MN, Martin AR, Russell JC and West CJ (eds) Island Invasives: Scaling up to meet the challenge. IUCN, Gland, Switzerland, pp. 131-137
Howald GR (1997) The risk of non-target species poisoning from brodifacoum used to eradicate rats from Langara Island, Bristish Columbia, Canada. M.Sc. Thesis, University of Bristish Columbia, Vancouver, British Columbia, Canada.
Howald G, Samaniego A, Buckelew S, et al. (2004) Palmyra Atoll rat eradication assessment trip report, Ausgust 2004. Unpublished report to USFWS, Island Conservation. Santa Cruz, CA, USA.
Howald GR, Faulkner KR, Tershy B, et al. (2005) Eradication of black rats from Anacapa Island: biological and social considerations. In: Garcelon DK, Schewemm CA (eds) Proceedings of the Sixth California Islands Symposium. Institute for Wildlife Studies, Arcata, USA, pp. 299-312
Howald G, Donlan CJ, Galván JP, et al. (2007) Invasive rodent eradication on islands. Conservation Biology 21:1258-1268
Howald G, Donlan CJ, Faulkner KR, et al. (2010) Eradication of black rats Rattus rattus from Anacapa Island. Oryx 44(1):30-40
Howald G, Ross J, Buckle AP (2015) Rodent control and island conservation. In: Buckle AP and Smith RH (eds) Rodent pests and their control, 2nd edn. CAB International, Wallingford, pp 366-396
Jensen EL, Tapia W, Caccone A, et al. (2015) Genetics of a head-start program to guide conservation of an endangered Galápagos tortoise (Chelonoidis ephippium). Conservation Genetics 16:823–832
Jones C, Lyver P, Whitehead A, et al. (2015) Grey-faced petrel (Pterodroma gouldi) productivity unaffected by kiore (Pacific rats, Rattus exulans) on a New Zealand offshore island. New Zealand Journal of Zoology 42(3):131-144
Jones HP, Towns DR, Bodey T, et al. (2011) Recovery and restoration on seabird islands. In: Mulder CPH, Anderson WB, Towns DR, Bellingham PJ (eds) Seabirds islands: ecology, invasion, and restoration. Oxford University Press, Oxford, UK pp 317-357
Kaverman M, Bowie MH, Paterson AM (2003) The eradication of mammalian predators from Quail Island, Banks Peninsula, Canterbury, New Zealand. Wildlife Management Report No. 29. Lincoln University, Canterbury, New Zealand.
Less O (2014) Threat abatement plan to reduce the impacts of exotic rodents on biodiversity on Asutralian offshore islands of less than 100000 hectares 2009, Five yearly review. Australian Government, Australia
Lord Howe Island Board (2009) Draft Lord Howe Island Rodent Eradication Plan. Lord Howe Island Board, Lord Howe Island, pp. 124
Lord Howe Island Board (2016) Rodent eradication project DRAFT Public Environment Report, EPBC 2016/7703. Unpublished report. Lord Howe Island, NSW, Australia.
Lord Howe Island Board (2019) Lord Howe Island Rodent Eradication Project – Operational Plan. Lord Howe Island Board, Lord Howe Island, pp. 113
Lujan DT, Vice DS, Guerrero JP, et al. (2010) Rodent eradication on Cocos Island, Guam: integrating wildlife damage management, resort operations, and non-target concerns. In: Timm RM, Fagerstone KA (eds) Proceedings 24th Vertebarte Pest Conference. University of California, Davis, USA, pp.9-13
Main CE, Bell E, Floyd K, et al. (2019) Scaling down (cliffs) to meet the challenge: the Shiants’ black rat eradication. In: Veitch CR, Clout MN, Martin AR, Russell JC and West CJ (eds) Island Invasives: Scaling up to meet the challenge. IUCN, Gland, Switzerland, pp. 138-146
Marie A, Vanderwerf EA, Young LC, et al. (2014) Response of wedge-tailed shearwaters (Puffinus pacificus) to eradication of black rats (Rattus rattus) from Moku'auia Island after reinvasion. Pacific Science 68(4):547-553
Martin A, Richardson M (2019) Rodent eradication scaled up: clearing rats and mice from South Georgia. Oryx 53:27-35
McClelland P (2002) Eradication of Pacific rats (Rattus exulans) from Whenua Hou Nature Reserve (Codfish Island), Putauhinu and Rarotoka Islands, New Zealand. In: Veitch CR and Clout M (eds) Turning the Tide: The Eradication of Invasive Species. IUCN, Gland, Switzerland, pp. 173-181
McClelland P (2011) Campbell Island–pushing the boundaries of rat eradications. In: Veitch C, Clout M and Towns D (eds) Island Invasives: Eradication and Management. IUCN, Gland, Switzerland, pp. 204-207
McFadden I (1992) Eradication of kiore (Rattus exulans) from Double Island, Mercury Group in Northen New Zealand. Science and Research Internal Report No. 130. Department of Conservation, Wellington, New Zealand
McFadden I, Towns D (1991) Eradication campaings against kiore (Rattus exulans) on Rurima rocks and Korapuki, northern New Zealand, Science & Research Internal Report No. 97. Department of Conservation, Wellington, New Zealand
Meier GG, Varnham K (2004) Rat eradication as part of a green turtle (Chelonias mydas) conservation programme in Indonesia. Marine Turtle Newsletter 106:11-12
Merton D, Climo G, Laboudallon V, et al. (2002) Alien mammal eradication and quarantine on inhabited islands in the Seychelles. In: Veitch CR and Clout MN (eds) Turning the Tide: The Eradication of Invasive Species. IUCN, Gland, Switzerland, pp. 182-198
Millet JE, Hill MJ, Parr SJ, et al. (2000) Eradication of alien mammalian predators in the Seychelles in 2000. In: Assessment and management of alien species that threaten ecosystems, habitat ans species. Abstracts of keynote addresses and posters presented at the sixth meeting of the Subsidiary Body on Scientific, Technical and Technological Advice, CBD Technical Series No. 1. SCBC, Montreal, Ca…
Morris KD (2002) The eradication of black rat (Rattus rattus) on Barrow and adjacent islands off the north-west coast of Western Asutalia. In: Veitch CR and Clout MN (eds) Turning the Tide: The Eradication of Invasive Species. IUCN, Gland, Switzerland, pp. 219-225
Mossman B (2001) Operational report for mouse eradication in the Mokoia Island. Unpublished report. Department of Conservation, Rotorua Lakes, New Zealand, pp. 13
Nicholls H (2013) Invasive Spcies: The 18km² rat trap. Nature 497:306-308
Olivera P, Menezes D, Trout R, et al. (2010) Successful eradication of the European rabbit (Oryctolagus cuniculus) and house mouse (Mus musculus) from the island of Selvagem Grande (Macaronesian archipelago), in the Eastern Atlantic. Integrative Zoology 5:70-83
Oppel S, Bond AL, Brooke M de L, et al. (2016) Temporary captive population and rapid population recovery of an endemic flightless rail after a rodent eradication operation using aerially distributed poison bait. Biological Conservation 204B:442-448
Oppel S, Lavers JL, Bond AL, et al. (2016) Reducing the primary exposure risk of Henderson crakes (Zapornia atra) during aerial broadcast eradication by selecting appropriate bait colour. Wildlife Research 43(4):298-303
Orueta JF, Ramos YA (1998) Methods to control and eradicate non native terrestrial vertebrate species. Nature and Environment (Council of Europe) No. 118. Council of Europe, Strasbourg
Orueta JF, Aranda Y, Gómez T, et al. (2005) Successful eradication of invasive rodents from a small island through pulsed baiting inside covered stations. Biological invasions 7:141-147
Palmer R (2013) The eradication of invasive rats from Adele Island - Environmental Risk Assessment. Unpublished report, Department of Parks and Wildlife, The Government of Western Australia, Australia
Palmer R (2014) Eradication of the Pacific Rat (Rattus exulans) from Adele Island Nature Reserve, Western Australia APVMA permit number - PER13966, Impact of the October 2013 aerial baiting on non-target species. Department of Parks and Wildlife, The Goverment of Western Australia, Australia
Parkes JP, Fisher P (2017) Review of the Lehua Island rat eradication project 2009. Pacific Cooperative Studies Unit technical report 195. Unpublished report, University of Hawai'i at Mānoa, Department of Botany, Honolulu, USA
Parkes J, Fisher P, Russell J, et al. (2007) Exotic rodents on Australian islands: issues paper. Unpublished report, Department of Environment and Water Resources, Canberra, Australia
Parkes JP, Panetta FD (2009) Eradication of invasive species: progress and emerging issues in the 21st century. In: Clout MN, Williams PA (eds) Invasive species management. Oxford University Press, Oxford, UK, pp 47-60
Parr SJ, Hill MJ, Nevill J, et al. (2000) Alien species case-study: eradication of inroduced mammals in Seychelles in 2000. Unpublished report. World Conservation Union, Gland, Switzerland.
Pascal M, Siorat F, Cosson JF, et al. (1996) Éradication de populations insulaires de Surmulot (Archipel des Sept-Îles-Archipel de Cancale: Bretagne, France). Vie Milieu 46:267-283
Pearson J, St. Pierre P, Lock L, et al. (2019) Working with the local community to eradicate cats on an inhabited island: securing the seabird heritage of the Isles of Scilly. In: Veitch CR, Clout MN, Martin AR, Russell JC and West CJ (eds) Island invasives: Scaling up to meet the challenge. International Union for Conservation of Nature and Natural Resources, Gland, Switzerland, pp. 670-678
Pierce R, Anterea N, Anterea U, et al. (2008) Operational work undertaken to eradicate rats and rabbits in the Phoenix Islands, Republic of Kiribati, May-June 2008. Pacific Expeditions Ltd unpublished report for Goverment of Kiribati, NZ Department of Conservation, NZAID and Pacific Invasives Initiative.
Pierce R, Blanvillain C, Burle MH (2015) Bird research and monitoring associated with SOP Manu pest eradication in Acteon-Gambier Archipelagos, June 2015. Unpublished report. Birdlife International, Pacific Secretariat. Suva, Fiji, pp. 22
Priddel D, Carlile N, Wilkinson I, et al. (2011) Eradication of exotic mammals from offshore islands in New South Wales, Australia. In: Veitch CR, Clout M and Towns DR (eds) Island Invasives: Eradication and Management. IUCN, Gland, Switzerland, pp. 337-344
Pott M, Griffiths R, Burle M-H, et al. (2014) Protecting the Tuamotu sandpiper (Prosobonia cancellata) one island at a time. In: Timm RM, O’Brien JM (eds) Proceedings 26th Vertebrate Pest Conference. University of California, Davis, USA, pp. 166-171
Robertson HA, Colbourne RM, Nieuwland F (1993) Survival of little spotted kiwi and other forest birds exposed to brodifacoum rat poison on Red Mercury Island. Notornis 40:253-262
Rueda D, Campbell KJ, Fisher P, et al. (2016) Biologically significant residual persistence of brodifacoum in reptiles following invasive rodent eradication, Galapagos Islands, Ecuador. Conservation Evidence 13:38
Rueda D, Carrion V, Castaño PA, et al. (2019) Preventing extinctions: planning and undertaking invasive rodent eradication from Pinzon Island, Galapagos. In: Veitch CR, Clout MN, Martin AR, Russell JC and West CJ (eds) Island invasives: Scaling up to meet the challenge. International Union for Conservation of Nature and Natural Resources, Gland, Switzerland, pp. 51-56
Ruffino L, Krebs E, Passetti A, et al. (2015) Eradications as scientifi experiments: progress in simultaneous eradications of two major invasive taxa from a Mediterranean island. Pest Management Science 71:189-198
Salmon T (2010) The Rat Island rat eradication project: a critical evaluation of nontarget mortality. Unpublished report. The Ornithological Council. Bethesda, MD, USA, pp. 85
Samaniego-Herrera A, Aguirre-Muñoz A, Bedolla-Guzmán Y, et al. (2018) Eradicating invasive rodents from wet and dry tropical islands in Mexico. Oryx 52(3):559-570
Samaniego-Herrera A, Aguirre-Muñoz A, Howald G, et al. (2009) Eradication of black rats from Farallón de San Ignacio and San Pedro Martir Islands, Gulf of California, Mexico. In: Damiani CC, Garcelon DK (eds) Proceedings of the 7th California Islands Symposium. Institute for Wildlife Studies, Arcata, CA, USA, pp 337-347
Samaniego A, Griffiths R, Gronwald M, et al. (2020) A sucessful Pacific rat Rattus exulans eradication on tropical Reiono Island (Tetiaroa Atoll, French Polynesia) despite low baiting rates. Conservation Evidence 17:12-14
Samaniego A, Kappes P, Broome K, et al. (2020) Lessons learned from failed island rodent eradications redone succesfully: implications for the second rat eradication attempt on Wake Atoll. Report QA-3179. USDA APHIS Wildlife Services National Wildlife Research Center, Hilo, HI, USA.
Schulwitz S, Castaño PA, Mosquera D, et al. (2018) Floreana Island re-colonization potential of the Galápagos short-eared owl (Asio flammeus galapagoensis). Conservation Genetics 19:193-205
Shah NJ (2001) Eradication of alien predators in the Seychelles: an example of conservation action on tropical islands. Biodiversity & Conservation 10(7):1219-1220
Sposimo P, Capizzi D, Cencetti T, et al. (2019) Rat and lagomorph eradication on two large islands of central Mediterranean: differences in island morphology and consequences on methods, problems, and targets. In: Veitch CR, Clout MN, Martin AR, Russell JC and West CJ (eds) Island invasives: Scaling up to meet the challenge. International Union for Conservation of Nature and Natural Resources, Gl…
Sposimo P, Spano G, Navone A, et al. (2011) Rat eradication at Yelkouan sherwater Puffinus yelkouan colonies on NE Sardinian islets: success followed by unexplained re-apperance. In: Yésou P, Bacceti N, Sultana J (eds), Ecology and Conservation of Mediterranean Seabirds and other bird species under the Barcelona Convention - Proceedings of the 13th Medmaravais Pan-Mediterranean Symposium. Medmara…
Sposimo P, Spano G, Navone A, et al. (2012) Rodent eradication on Molara Island and surrounding islets (NE Sardinia): from success to the riddle of reinvasion. Aliens 32:33-38
Springer K (2012) Ecological restoration of sub-Antarctic Macquarie Island. In: Timms RM (ed) Proceedings 25th Vertebrate Pest Conference. University of California, Davis, USA, pp 34-37
Springer K (2016) Methodology and challenges of a complex multi-species eradication in the sub-Antarctic and immediate effects of invasive species removal. New Zealand Journal of Ecology 40:273-278
Springer K (2018) Eradication of invasive species on Macquarie Island to restore the natural ecosystem. In: Garnett ST, Latch P, Lindenmayer DB, Woinarski JCZ (eds) Recovering Australian threatened species: a book of hope. CSIRO Publishing, Melbourne, Australia, pp. 13-22
Springer K, Carmichael N (2012) Non-target species management for the Macquarie Island pest eradication project. In: Timm RM (ed) Proceedings of the 25th Vertebrate Pest Conference. pp. 38-47
Taylor RH, Thomas BW (1993) Rats eradicated from rugged Breaksea Island (170ha), Fiordland, New Zealand. Biological Conservation 65(3):191-198
Taylor RH, Kaiser GW, Drever MC (2000) Eradication of Norway rats for recovery of seabird habitat on Langara Island, British Columbia. Restoration Ecology 8:151-160
Thorsen M, Shorten R, Lucking R, et al. (2000) Norway rats (Rattus norvegicus) on Frégate Island, Seychelles: the invasion; subsequent eradication attempts and implications for the island's fauna. Biological Conservation 96(2):133-138
Tompkins J (2000) Eradication of Rattus norvegicus from seabird habitat in Canada. Unpublished report, Universty of Minnesota, St. Paul. MN, USA.
Torr N (2002) Eradication of rabbits and mice from subantarctic Enderby and Rose Islands. In: Veitch CR and Clout MN (eds) Turning the tide: the eradication of invasive species. IUCN, Gland, Switzerland, pp. 319-328
Towns DR, Broome KG (2003) From small Maria to massive Campbell: forty years of rat eradications from New Zealand islands. New Zealand Journal of Zoology 30:377-398
Towns D, McFadden I, Lovegrove T (1993) Offshore islands co-operative conservation project with ICI Crop Care Division: Phase one (Stanley Island), Science & Research Internal Report No. 138. Department of Conservation, Wellington, New Zealand
Veitch CR (2002) Eradication of Pacific rats (Rattus exulans) from Tiritiri Matangi Island, Hauraki Gulf, New Zealand. In: Veitch CR and Clout MN (eds) Turning the tide: the eradication of invasive species. IUCN, Gland, Switzerland, pp.360-364
Wegmann A, Flint E, White S, et al. (2012) Pushing the envelope in paradise: A novel approach to rat eradication at Palmyra Atoll. Proc. 25th Vertebrate Pest Conference. University of California, Davis, Monterey, California, USA. pp. 48-53
Walsh A, Wilson A, Bower H et al. (2019) Winning the hearts and minds-proceeding to implementation of the Lord Howe Island rodent eradication project: a case study. In: Veitch CR, Clout MN, Martin AR, Russell JC and West CJ (eds) Island invasives: Scaling up to meet the challenge. International Union for Conservation of Nature and Natural Resources, Gland, Switzerland, pp. 522-530
Wilkinson I, Priddel D (2011) Rodent eradication on Lord Howe Island: Challenges posed by people, livestock, and threatened endemics. In: Veitch C, Clout M and Towns D (eds) Island Invasives: Eradication and Management. IUCN, Gland, Switzerland, pp. 508-514
Will DJ, Swinnerton K, Silander S, et al. (2019) Applying lessons learnt from tropical rodent eradications: a second attempt to remove invasive rats from Desecheo National Wildlife Refuge, Puerto Rico. In: Veitch CR, Clout MN, Martin AR, Russell JC and West CJ (eds) Island invasives: Scaling up to meet the challenge. International Union for Conservation of Nature and Natural Resources, Gland, Swi…
Wheeler R, Priddel D, O’Dwyer T, et al. (2019) Evaluating the susceptibility of invasive black rats (Rattus rattus) and house mice (Mus musculus) to brodifacoum as a prelude to rodent eradication on Lord Howe Island. Biological Invasions 21:833-845
Witmer GW, Boyd F, Hillis-Starr Z (2007) The successful eradication of introduced roof rats (Rattus rattus) from Buck Island using diphacinone, followed by an irruption of house mice (Mus musculus). Wildlife Research 34(2):108-115
Witmer GW, Snow NP, Burke PW (2010) Evaluating commercially available rodenticide baits for invasive Gambian giant pouched rats (Cricetomys gambianus). Crop Protection 29(9):1011-1014
Witmer GW, Hall P (2011) Attempting to eradicate invasive Gambian giant pouched rats (Cricetomys gambianus) in the United States: lessons learned. In: Veitch C, Clout M and Towns D (eds) Island Invasives: Eradication and Management. IUCN, Gland, Switzerland, pp. 131-134
